# Supplementary material for: Computational Evaluation of IABP, Impella 2.5, TandemHeart and Combined IABP and Impella 2.5 Support in Cardiogenic Shock
Source: MDPI journal article supplement (doi:10.3390/math11163606), 2023-08-21
Supplement: s1 [file s1]

**Table S1.** Abbreviations used in the cardiovascular system model and equations.

| Nomenclature |                               |        |                                      |
|--------------|-------------------------------|--------|--------------------------------------|
| p            | pressure                      | lica   | left internal carotid artery         |
| V            | volume                        | rva    | right vertebral artery               |
| Q            | flow rate                     | lva    | left vertebral artery                |
| t            | time                          | roa    | right ophthalmic artery              |
| R            | resistance                    | loa    | left ophthalmic artery               |
| L            | inertance                     | ba     | basilar artery                       |
| C            | compliance                    | pca    | posterior cerebral arteries          |
| AV           | aortic valve                  | rpca   | right posterior cerebral artery      |
| MV           | mitral valve                  | lpca   | left posterior cerebral artery       |
| PV           | pulmonary valve               | rpcoa  | right posterior communicating artery |
| TV           | tricuspid valve               | lpcoa  | left posterior communicating artery  |
| MAP          | mean arterial pressure        | rsca   | right superior cerebellar artery     |
| CO           | cardiac output                | lsca   | left superior cerebellar artery      |
| S            | sensitivity                   | racha  | right anterior choroidal artery      |
| E            | elastance                     | lacha  | left anterior choroidal artery       |
| A            | coefficient                   | rmca   | right middle cerebral artery         |
| B            | coefficient                   | lmca   | left middle cerebral artery          |
| K            | coefficient                   | mca    | middle cerebral artery               |
| l            | long axis length              | raca   | right anterior cerebral artery       |
| r            | radius                        | laca   | left anterior cerebral artery        |
| n            | operating speed               | acoa   | anterior communicating artery        |
| Subscripts   |                               | pc     | pial circulation                     |
| la           | left atrium                   | cc     | cerebral capillaries                 |
| lv           | left ventricle                | vc     | cerebral veins                       |
| ra           | right atrium                  | es     | end-systolic                         |
| rv           | right ventricle               | lcora  | left coronary artery                 |
| ao           | aorta                         | rcora  | right coronary artery                |
| aa           | aortic arch                   | arcor  | coronary arterioles                  |
| af           | femoral artery                | ccor   | coronary capillaries                 |
| ars          | systemic arterioles           | sincor | coronary sinus                       |
| cs           | systemic capillaries          | set    | set point                            |
| vs           | systemic veins                | m      | mean                                 |
| ap           | pulmonary arteries            | 1      | segment one                          |
| arp          | pulmonary arterioles          | 2      | segment two                          |
| vp           | pulmonary veins               | IMP    | Impella 2.5                          |
| rica         | right internal carotid artery | IABP   | Intra-aortic balloon pump            |
|              |                               | TH     | TandemHeart                          |
